# Supplementary material
Source: PubMed Central journal article supplement (PMC6542656)
Supplement: EMS82896-supplement-SI.pdf [file EMS82896-supplement-SI.pdf]

Supporting Information:

**Convergence of theory and experiment on the role of preorganization, quantum tunneling and enzyme motions into flavoenzyme-catalyzed hydride transfer**

Manuel Delgado,<sup>†,#</sup> Stefan Görlich,<sup>‡,#</sup> James E. Longbotham,<sup>‡,l</sup> Nigel S. Scrutton,<sup>‡</sup> Sam Hay,<sup>‡,\*</sup> Vicent Moliner,<sup>†,¥,\*</sup> Iñaki Tuñón,<sup>§,\*</sup>

<sup>†</sup>Department of Physical and Analytical Chemistry, University Jaume I, 12071, Castelló de la Plana, Spain

<sup>‡</sup>Manchester Institute of Biotechnology and School of Chemistry, The University of Manchester, 131 Princess Street, Manchester, M1 7DN, United Kingdom.

<sup>l</sup>Current address: Department of Cellular and Molecular Pharmacology, University of California San Francisco, San Francisco, CA 94158-2140.

<sup>§</sup>Department of Physical Chemistry, University of València, 46100, Burjassot, Spain.

<sup>¥</sup>Department of Chemistry, University of Bath, Bath BA2 7AY, United Kingdom.

<sup>#</sup>These authors contributed equally.

**Corresponding authors**

\*S.H., e-mail, [sam.hay@manchester.ac.uk](mailto:sam.hay@manchester.ac.uk)

\*V.M, e-mail, [moliner@uji.es](mailto:moliner@uji.es)

\*I.T., e-mail, [ignacio.tunon@uv.es](mailto:ignacio.tunon@uv.es)

**Table S1.** Limiting rate constants ( $k_{\text{lim}}$ ), apparent saturation constants ( $K_S$ ) and KIEs on  $k_{\text{lim}}$  for the reaction of morphinone reductase with each coenzyme isotopologue

| Coenzyme isotopologue                    | $k_{\text{lim}}$ ( $\text{s}^{-1}$ )   | $K_S$ (mM)      | $\text{KIE}_{\text{lim}}$              |
|------------------------------------------|----------------------------------------|-----------------|----------------------------------------|
| NADH                                     | $55.8 \pm 1.1$                         | $0.13 \pm 0.01$ | -                                      |
| ( <i>R</i> )-[4- $^2\text{H}$ ]-NADH     | $7.92 \pm 0.14$                        | $0.09 \pm 0.01$ | $7.05 \pm 0.26$                        |
| ( <i>S</i> )-[4- $^2\text{H}$ ]-NADH     | $43.6 \pm 1.7$                         | $0.11 \pm 0.01$ | $1.28 \pm 0.08$                        |
| ( <i>R,S</i> )-[4- $^2\text{H}_2$ ]-NADH | $6.68 \pm 0.08$<br>( $6.43 \pm 0.08$ ) | $0.09 \pm 0.01$ | $8.36 \pm 0.26$<br>( $8.68 \pm 0.28$ ) |

Data are taken from the Figure 3. As the (*R,S*)-[4- $^2\text{H}_2$ ]-NADH contained significant  $^1\text{H}$  contamination at the C4 pro-*S* position (Figure S1), the observed rate constant and resulting KIE was corrected by linear extrapolation (Figure S2).<sup>1</sup> Corrected values are given in (parenthesis) and the correction has no effect on the magnitude of  $K_S$ . Note: We are only interested in the value of  $k_{\text{lim}}$  as this is the intrinsic rate of FMN reduction/hydride transfer from which the KIEs are determined.  $K_S$  is given only for completeness.

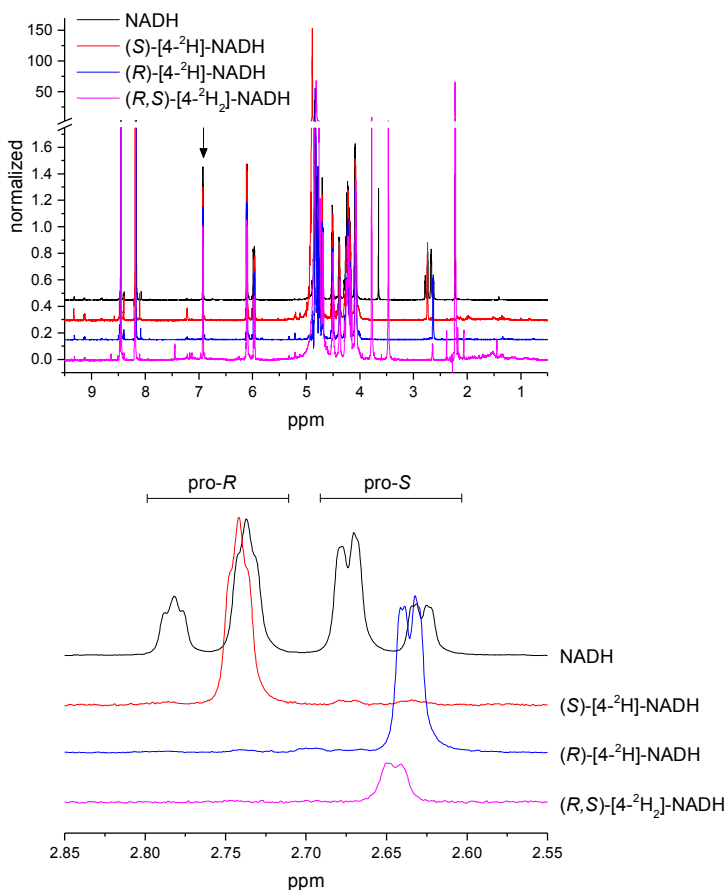

**Figure S1.**  $^1\text{H}$  NMR spectra of the NADH isotopologues. Spectra are normalized to the C2 proton marked with an arrow in the top panel and the bottom panel shows an expansion of the spectra around the C4 pro-*R* and pro-*S* protons. Isotopic purities of each isotopologue are given in Table S2. Samples were in 100%  $\text{D}_2\text{O}$  and spectra were recorded on a Bruker UltraShield 400 MHz spectrometer at 298 K.

**Table S2.** Isotopic purity (fraction  $^1\text{H}$ ) at the C4 position of each coenzyme isotopologue.

| Coenzyme isotopologue                    | pro- <i>R</i> | pro- <i>S</i> |
|------------------------------------------|---------------|---------------|
| NADH                                     | 0.98          | 0.98          |
| ( <i>S</i> )-[4- $^2\text{H}$ ]-NADH     | 0.99          | 0.04          |
| ( <i>R</i> )-[4- $^2\text{H}$ ]-NADH     | 0.01          | 0.97          |
| ( <i>R,S</i> )-[4- $^2\text{H}_2$ ]-NADH | 0.00          | 0.21          |

Data were determined by integration over the regions shown in Figure S2 after the spectra were normalized to the C2 proton (integral = 1.00). Error in these values is taken to be  $\pm 0.01$ .

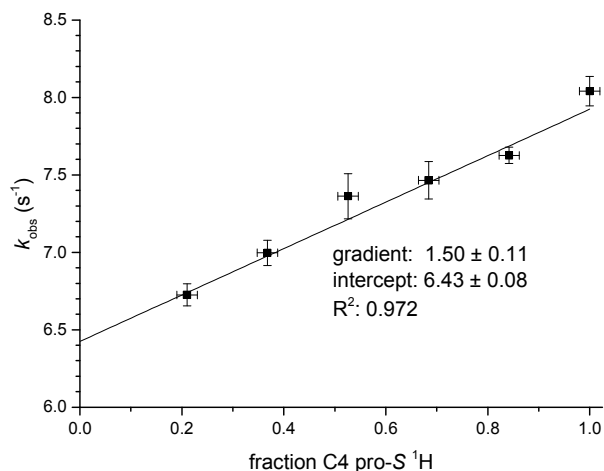

**Figure S2.** Correction of the observed rate of MR reduction by (*R,S*)-[4- $^2\text{H}_2$ ]-NADH for the isotopic impurity at the C4 pro-*S* position (Figure S2, Table S2). The observed rate was measured with mixtures of by (*R*)-[4- $^2\text{H}_2$ ]-NADH and (*R,S*)-[4- $^2\text{H}_2$ ]-NADH (5 mM total post-mixing concentration) essentially as described previously.<sup>1</sup> The trend is apparently linear, so the corrected (*R,S*)-[4- $^2\text{H}_2$ ]-NADH  $k_{\text{obs}}$  is taken to be the intercept ( $6.43 \pm 0.08 \text{ s}^{-1}$ ).

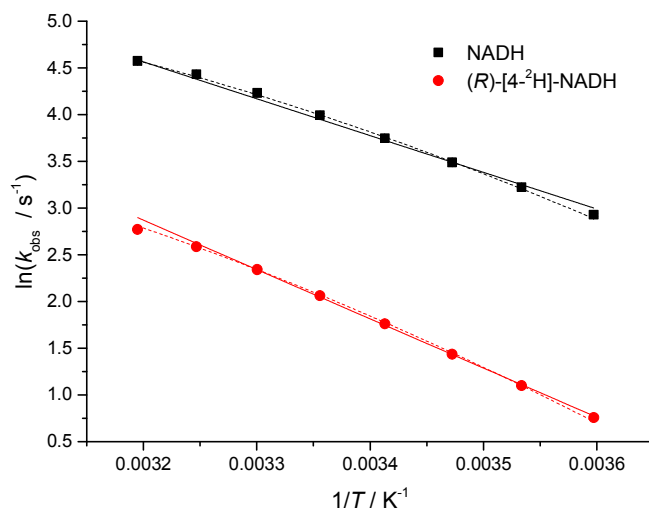

**Figure S3.** Arrhenius-type plot of the temperature dependence of the observed rate of hydride transfer from NADH and (R)-[4-<sup>2</sup>H]-NADH to the FMN in morphinone reductase. The data are fitted to the non-linear Eyring-based function:

$$\ln k_{\text{obs}} = \ln(k_{\text{B}}T/h) - \left( \Delta H_{T_0}^{\ddagger} + \Delta C_p^{\ddagger}(T - T_0) \right) / RT + \left( \Delta S_{T_0}^{\ddagger} + \Delta C_p^{\ddagger} \ln(T/T_0) \right) / R$$

where  $\Delta C_p^{\ddagger}$  is the difference in heat capacity between the reactant and transition states,  $\Delta H_{T_0}^{\ddagger}$  and  $\Delta S_{T_0}^{\ddagger}$  are the activation enthalpy and entropy, respectively at a reference temperature  $T_0$  (298 K in this study) and  $k_{\text{B}}$ ,  $h$  and  $R$  are the Boltzmann, Planck and ideal gas constants, respectively.<sup>2,3</sup> Fitting values are given in Table S3 and rate constants are tabulated in Table S4. Measurements were performed with saturating (5 mM post-mixing) concentrations of each coenzyme and  $\sim 20 \mu\text{M}$  (post-mixing) morphinone reductase in 50 mM potassium phosphate, pH 7.0 under anaerobic conditions.

**Table S3.** Fitting parameters for the fits of the Arrhenius-type data in Figure S3.

| parameter                                                            | $\Delta C_p^\ddagger$ floating | $\Delta C_p^\ddagger$ fixed to zero |
|----------------------------------------------------------------------|--------------------------------|-------------------------------------|
| $\Delta H^\ddagger_{\text{H}}$ , kJ mol <sup>-1</sup>                | 31.0 ± 0.3                     | 30.3 ± 0.5                          |
| $\Delta H^\ddagger_{\text{D}}$ , kJ mol <sup>-1</sup>                | 39.2 ± 0.6                     | 41.4 ± 0.8                          |
| $\Delta\Delta H^\ddagger$ , kJ mol <sup>-1</sup>                     | 8.3 ± 0.8                      | 11.1 ± 1.3                          |
| $\Delta S^\ddagger_{\text{H}}$ , J mol <sup>-1</sup> K <sup>-1</sup> | -107.7 ± 0.9                   | -110.4 ± 1.8                        |
| $\Delta S^\ddagger_{\text{D}}$ , J mol <sup>-1</sup> K <sup>-1</sup> | -96.0 ± 1.9                    | -88.9 ± 2.6                         |
| $\Delta\Delta S^\ddagger$ , J mol <sup>-1</sup> K <sup>-1</sup>      | 11.7 ± 2.8                     | 21.5 ± 4.3                          |
| $\Delta C_p^\ddagger_{\text{H}}$ , kJ mol <sup>-1</sup>              | -0.48 ± 0.08                   | -                                   |
| $\Delta C_p^\ddagger_{\text{D}}$ , kJ mol <sup>-1</sup>              | -0.50 ± 0.11                   | -                                   |
| $\Delta\Delta C_p^\ddagger$ , kJ mol <sup>-1</sup>                   | -0.02 ± 0.19                   | -                                   |

**Table S4.** Tabulated rate constants for the reaction of morphinone reductase with either 5 mM NADH or 5 mM (*R*)-[4-<sup>2</sup>H]-NADH at 5-40 °C.

| Temperature, °C | $k_{\text{obs}}$ , s <sup>-1</sup> |                                       | KIE <sub>obs</sub> |
|-----------------|------------------------------------|---------------------------------------|--------------------|
|                 | NADH                               | ( <i>R</i> )-[4- <sup>2</sup> H]-NADH |                    |
| 5               | 18.72 ± 0.32                       | 2.136 ± 0.041                         | 8.76 ± 0.23        |
| 10              | 25.13 ± 0.17                       | 2.999 ± 0.012                         | 8.38 ± 0.07        |
| 15              | 32.76 ± 0.09                       | 4.207 ± 0.054                         | 7.79 ± 0.10        |
| 20              | 42.44 ± 0.35                       | 5.823 ± 0.069                         | 7.29 ± 0.11        |
| 25              | 54.33 ± 0.74                       | 7.866 ± 0.048                         | 6.91 ± 0.10        |
| 30              | 68.92 ± 0.36                       | 10.40 ± 0.01                          | 6.63 ± 0.04        |
| 35              | 84.20 ± 0.78                       | 13.28 ± 0.07                          | 6.34 ± 0.07        |
| 40              | 97.15 ± 0.20                       | 15.97 ± 0.23                          | 6.08 ± 0.09        |

### Computational details.

The quasi-classical activation free energy at the TS,  $\Delta G_{act}^{QC}$ , is calculated as:

$$\Delta G_{act}^{QC}(T, \xi) = \left[ W^{CM}(T, \xi^*) + \Delta W_{vib}(T, \xi^*) \right] - \left[ W^{CM}(T, \xi_R) + \Delta W_{vib,R}(T) + G_{R,T,F}^{CM} \right] \quad (1)$$

where  $\Delta W_{vib}(T, \xi^*) \Delta W_{vib}(T, z^*)$  corrects  $W^{CM}(T, \xi^*) W^{CM}(T, z^*)$  to account for quantized vibrations orthogonal to  $\xi$ , the reaction coordinate along which the PMF is defined, at the maximum of the PMF,  $\xi^*$ ;  $\Delta W_{vib,R}(T) \Delta W_{vib,R}(T)$  corrects  $W^{CM}(T, \xi_R) W^{CM}(T, z_R)$  for quantized vibrations at the reactant side minimum of the PMF,  $\xi_R$ , and  $G_{R,T,F}^{CM} G_{R,T,F}^{CM}$  is a correction for the vibrational free energy of the reactant mode that correlates with motion along the reaction coordinate.<sup>4</sup>

Grote-Hynes theory allow one to obtain the recrossing transmission coefficient through the ratio between the reactive frequency,  $\omega_r$ , and the equilibrium barrier frequency,  $\omega_{eq}$ , as shown in equation (2):<sup>5</sup>

$$\gamma_{GH} = \frac{\omega_r}{\omega_{eq}} \quad (2)$$

The equilibrium frequency was obtained from PMFs for the reaction in the enzyme, using a parabolic fit around the TS region:. The same procedure than before was carried out to obtain the PMFs, but using a small range of the reaction coordinate values around TS region (approximately 0.15 Å), and fitted them to a parabolic function:

$$\Delta PMF = -\frac{1}{2} k_{eq} (\xi - \xi^\ddagger)^2 \quad (3)$$

where  $\Delta PMF$  is the potential of mean force difference with respect to the maximum in the profile,  $k_{eq}$  is the equilibrium force constant and  $\xi^\ddagger$  is the reaction coordinate of the maximum of the profile. Consequently, the equilibrium frequency is

$$\omega_{eq} = \frac{1}{2\pi c} \sqrt{\frac{k_{eq}}{\mu_\xi}} \quad (4)$$

where  $\mu_\xi$  is the reaction coordinate reduced mass and  $c$  is the speed of light.

Once the equilibrium frequency is known, the reactive frequency can be obtained via the GH equation:<sup>6,7</sup>

$$\omega_r^2 - \omega_{eq}^2 + \omega_r \int_0^\infty \zeta_{TS}(t) e^{-\omega_r t} dt = 0 \quad (5)$$

The friction kernel ( $\zeta_{TS}(t)$ ) can be obtained from the autocorrelation of the forces projected on the reaction coordinate obtained from simulation where the system is kept at the TS:<sup>5</sup>

$$\zeta_{TS}(t) = \frac{\langle F_\xi(0) F_\xi(t) \rangle_{\xi=\xi^*}}{\mu_\xi k_B T} \quad (6)$$

where  $k_B$  is the Boltzmann constant, T is the temperature and  $\zeta_{TS}(t)$  quantifies the dynamical coupling of the protein motion to the reaction coordinate  $\xi$ . The equilibrium frequency,  $\omega_{eq}$ , does not depend on the mass, so it is the same for the four isotopologues. However, the reactive frequency,  $\omega_r$ , does depend on the mass of each isotopologue through the friction kernel,  $\zeta_{TS}(t)$ .

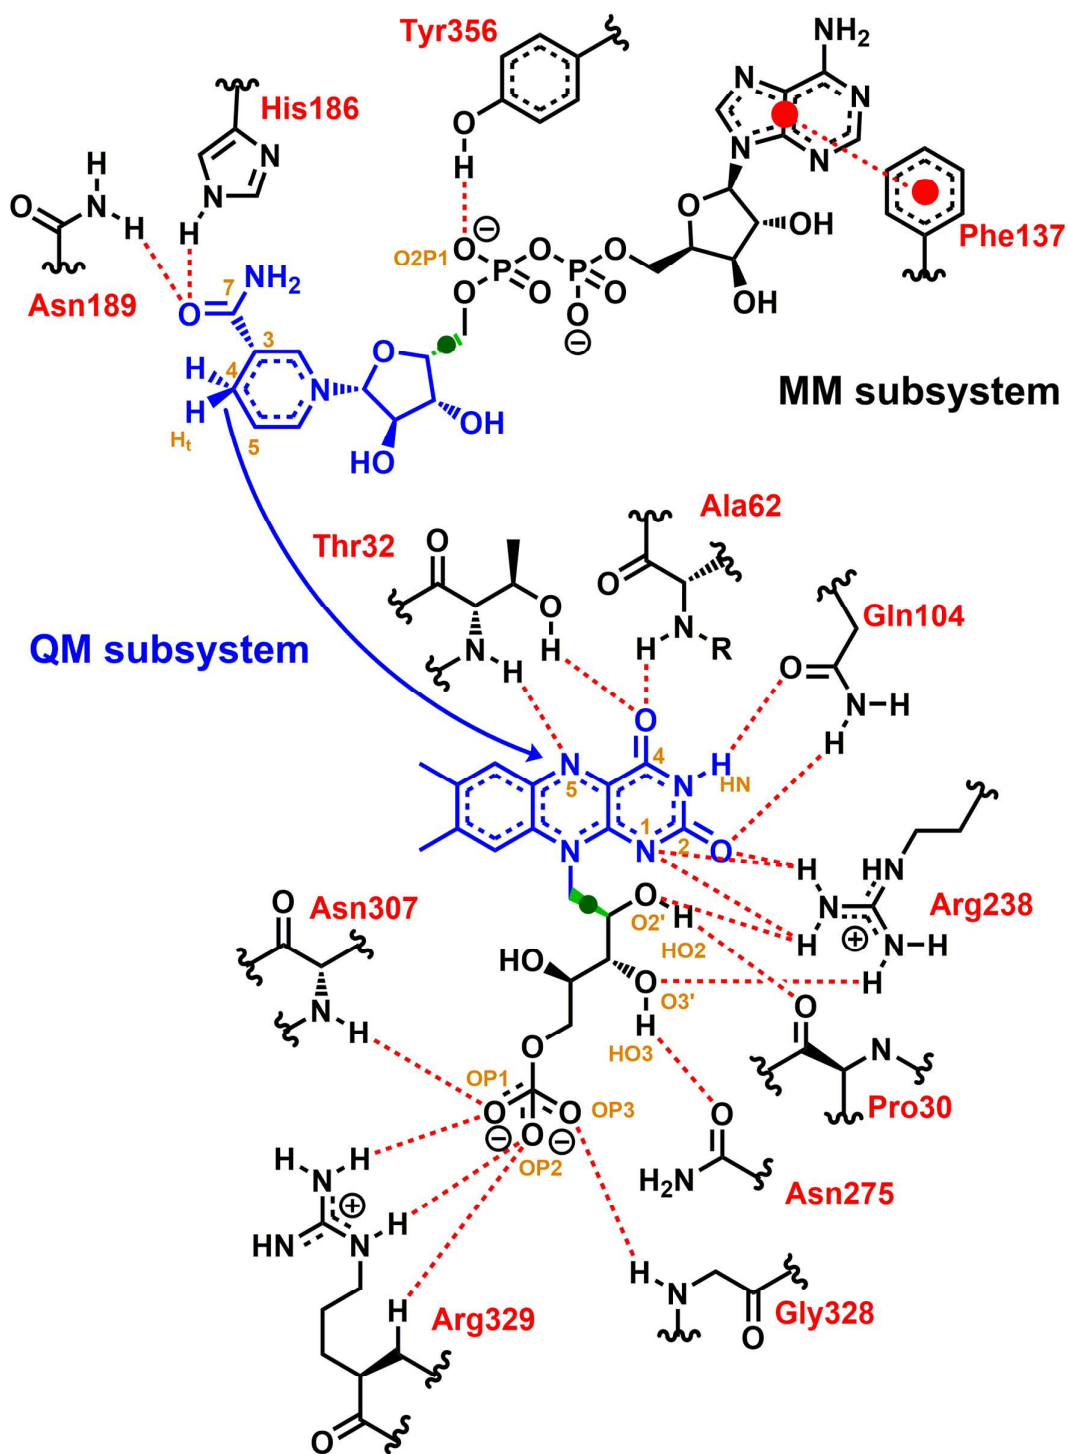

**Scheme S1.** Representation of the active site of MR showing the QM/MM partitioning scheme. QM part is colored in blue while MM part is colored in black. Green circles represent the quantum hydrogen link atoms. Key amino acids are included to describe the most important interactions between substrate/cofactor and enzyme. Interacting atoms in substrate/cofactor have been labeled in orange.



**Table S5.** Energy barriers and stationary points key distances for hydride transfer reaction in MR enzyme by using AM1, RM1 and B3LYP-D3/6-31G(d,p).

|                              |                                                                                  | AM1   | RM1   | B3LYP-D3 | RM1 with spline correctionss |
|------------------------------|----------------------------------------------------------------------------------|-------|-------|----------|------------------------------|
| $\Delta E^\ddagger$          |                                                                                  | 40.2  | 13.3  | 14.1     | 14.1                         |
| $\Delta E_{\text{reaction}}$ |                                                                                  | 14.6  | 6.2   | 5.5      | 6.1                          |
| RS                           | $\alpha(\text{C4}_{\text{cofac}}\text{-H}_t\text{-N5}_{\text{subs}})$            | 130.2 | 151.9 | 133.4    | 137.7                        |
|                              | $d(\text{C4}_{\text{cofac}}\text{-H}_t) - d(\text{N5}_{\text{subs}}\text{-H}_t)$ | -2.11 | -1.08 | -1.59    | -1.41                        |
|                              | $d(\text{C4}_{\text{cofac}}\text{-N5}_{\text{subs}})$                            | 4.03  | 3.21  | 3.55     | 3.42                         |
|                              | $d(\text{C4}_{\text{cofac}}\text{-H}_t)$                                         | 1.11  | 1.11  | 1.10     | 1.11                         |
|                              | $d(\text{N5}_{\text{subs}}\text{-H}_t)$                                          | 3.22  | 2.19  | 2.69     | 2.52                         |
| TS                           | $\alpha(\text{C4}_{\text{cofac}}\text{-H}_t\text{-N5}_{\text{subs}})$            | 172.0 | 163.0 | 160.4    | 162.9                        |
|                              | $d(\text{C4}_{\text{cofac}}\text{-H}_t) - d(\text{N5}_{\text{subs}}\text{-H}_t)$ | 0.17  | 0.09  | 0.09     | 0.09                         |
|                              | $d(\text{C4}_{\text{cofac}}\text{-N5}_{\text{subs}})$                            | 2.74  | 2.64  | 2.65     | 2.64                         |
|                              | $d(\text{C4}_{\text{cofac}}\text{-H}_t)$                                         | 1.46  | 1.38  | 1.39     | 1.38                         |
|                              | $d(\text{N5}_{\text{subs}}\text{-H}_t)$                                          | 1.29  | 1.29  | 1.30     | 1.29                         |
| PS                           | $\alpha(\text{C4}_{\text{cofac}}\text{-H}_t\text{-N5}_{\text{subs}})$            | 164.7 | 155.4 | 139.0    | 145.5                        |
|                              | $d(\text{C4}_{\text{cofac}}\text{-H}_t) - d(\text{N5}_{\text{subs}}\text{-H}_t)$ | 1.78  | 1.35  | 1.07     | 1.01                         |
|                              | $d(\text{C4}_{\text{cofac}}\text{-N5}_{\text{subs}})$                            | 3.81  | 3.35  | 2.96     | 2.95                         |
|                              | $d(\text{C4}_{\text{cofac}}\text{-H}_t)$                                         | 2.81  | 2.39  | 2.10     | 2.04                         |
|                              | $d(\text{N5}_{\text{subs}}\text{-H}_t)$                                          | 1.03  | 1.03  | 1.03     | 1.03                         |

**Table S6.** Key averaged structural parameters of RS from 100 ns MM simulation by using a CHARMM General Force Field with the NAMD program, performed at 298 K. Distances are in Å and angles in degrees.

|                                                                                  | RS              |
|----------------------------------------------------------------------------------|-----------------|
| $\alpha(\text{C4}_{\text{cofac}}\text{-H}_t\text{-N5}_{\text{subs}})$            | $144 \pm 20$    |
| $d(\text{C4}_{\text{cofac}}\text{-H}_t) - d(\text{N5}_{\text{subs}}\text{-H}_t)$ | $-1.69 \pm 0.4$ |
| $d(\text{C4}_{\text{cofac}}\text{-N5}_{\text{subs}})$                            | $3.6 \pm 0.4$   |
| $d(\text{C4}_{\text{cofac}}\text{-H}_t)$                                         | 1.11            |
| $d(\text{N5}_{\text{subs}}\text{-H}_t)$                                          | $2.7 \pm 0.5$   |

**Table S7.** Key averaged structural parameters of RS, TS and PS from 100 ps MD simulation at AM1/MM level performed at 298 K. Distances are in Å and angles in degrees.

|                                                                                  | <b>RS</b>        | <b>TS</b>       | <b>PS</b>       |
|----------------------------------------------------------------------------------|------------------|-----------------|-----------------|
| $\alpha(\text{C4}_{\text{cofac}}\text{-H}_t\text{-N5}_{\text{subs}})$            | $147 \pm 12$     | $161 \pm 8$     | $162 \pm 8$     |
| $d(\text{C4}_{\text{cofac}}\text{-H}_t) - d(\text{N5}_{\text{subs}}\text{-H}_t)$ | $-1.56 \pm 0.04$ | $0.06 \pm 0.04$ | $0.96 \pm 0.03$ |
| $d(\text{C4}_{\text{cofac}}\text{-N5}_{\text{subs}})$                            | $3.65 \pm 0.10$  | $2.45 \pm 0.07$ | $2.97 \pm 0.07$ |
| $d(\text{C4}_{\text{cofac}}\text{-H}_t)$                                         | $1.11 \pm 0.04$  | $1.27 \pm 0.04$ | $1.98 \pm 0.04$ |
| $d(\text{N5}_{\text{subs}}\text{-H}_t)$                                          | $2.67 \pm 0.05$  | $1.22 \pm 0.04$ | $1.03 \pm 0.03$ |
| $d(\text{O7N}_{\text{cofac}}\text{-HE2}_{\text{HIS186}})$                        | $1.88 \pm 0.13$  | $1.87 \pm 0.12$ | $1.89 \pm 0.12$ |
| $d(\text{O7N}_{\text{cofac}}\text{-HD21}_{\text{ASN189}})$                       | $2.03 \pm 0.21$  | $2.2 \pm 0.3$   | $2.3 \pm 0.3$   |
| $d(\text{O7N}_{\text{cofac}}\text{-ND2}_{\text{ASN189}})$                        | $3.00 \pm 0.19$  | $3.11 \pm 0.24$ | $3.18 \pm 0.24$ |
| $d(\text{O2P1}_{\text{cofac}}\text{-HH}_{\text{TYR356}})$                        | $1.8 \pm 0.4$    | $1.56 \pm 0.10$ | $1.57 \pm 0.10$ |
| $d(\text{O}_{\text{adenine, subs}}\text{-O}_{\text{Phe137}})$                    | $4.2 \pm 0.3$    | $4.2 \pm 0.3$   | $3.95 \pm 0.18$ |
| $d(\text{N5}_{\text{subs}}\text{-H}_{\text{THR132}})$                            | $1.92 \pm 0.10$  | $2.04 \pm 0.11$ | $1.99 \pm 0.11$ |
| $d(\text{O4}_{\text{subs}}\text{-HG1}_{\text{THR132}})$                          | $1.99 \pm 0.15$  | $1.92 \pm 0.12$ | $1.89 \pm 0.12$ |
| $d(\text{O4}_{\text{subs}}\text{-H}_{\text{ALA62}})$                             | $2.7 \pm 0.3$    | $2.7 \pm 0.3$   | $2.7 \pm 0.3$   |
| $d(\text{HN}_{\text{subs}}\text{-OE1}_{\text{GLN104}})$                          | $1.96 \pm 0.16$  | $1.97 \pm 0.15$ | $2.01 \pm 0.16$ |
| $d(\text{O2}_{\text{subs}}\text{-HE22}_{\text{GLN104}})$                         | $2.11 \pm 0.19$  | $2.07 \pm 0.17$ | $2.04 \pm 0.16$ |
| $d(\text{O2}_{\text{subs}}\text{-HH11}_{\text{ARG238}})$                         | $2.01 \pm 0.14$  | $1.98 \pm 0.13$ | $1.93 \pm 0.12$ |
| $d(\text{N1}_{\text{subs}}\text{-HH11}_{\text{ARG238}})$                         | $2.52 \pm 0.14$  | $2.50 \pm 0.14$ | $2.50 \pm 0.14$ |
| $d(\text{N1}_{\text{subs}}\text{-HH12}_{\text{ARG238}})$                         | $2.64 \pm 0.17$  | $2.58 \pm 0.17$ | $2.57 \pm 0.16$ |
| $d(\text{N1}_{\text{subs}}\text{-NH1}_{\text{ARG238}})$                          | $2.98 \pm 0.10$  | $2.96 \pm 0.10$ | $2.95 \pm 0.10$ |
| $d(\text{O2}'_{\text{subs}}\text{-HH12}_{\text{ARG238}})$                        | $1.94 \pm 0.18$  | $1.93 \pm 0.18$ | $1.90 \pm 0.16$ |
| $d(\text{HO2}_{\text{subs}}\text{-O}_{\text{PRO30}})$                            | $2.04 \pm 0.19$  | $1.97 \pm 0.17$ | $1.93 \pm 0.16$ |
| $d(\text{O3}'_{\text{subs}}\text{-HH22}_{\text{ARG238}})$                        | $2.03 \pm 0.21$  | $2.01 \pm 0.21$ | $1.96 \pm 0.20$ |
| $d(\text{HO3}_{\text{subs}}\text{-OD1}_{\text{ASN275}})$                         | $2.3 \pm 0.3$    | $2.3 \pm 0.3$   | $2.2 \pm 0.3$   |
| $d(\text{OP1}_{\text{subs}}\text{-H}_{\text{ASN307}})$                           | $2.1 \pm 0.3$    | $2.1 \pm 0.3$   | $1.85 \pm 0.22$ |
| $d(\text{OP1}_{\text{subs}}\text{-HH11}_{\text{ARG329}})$                        | $1.58 \pm 0.17$  | $2.1 \pm 0.3$   | $1.53 \pm 0.10$ |
| $d(\text{OP2}_{\text{subs}}\text{-HE}_{\text{ARG329}})$                          | $2.2 \pm 0.4$    | $2.1 \pm 0.3$   | $1.93 \pm 0.24$ |
| $d(\text{OP2}_{\text{subs}}\text{-H}_{\text{ARG329}})$                           | $1.79 \pm 0.13$  | $1.72 \pm 0.12$ | $1.77 \pm 0.12$ |
| $d(\text{OP3}_{\text{subs}}\text{-H}_{\text{GLY328}})$                           | $1.74 \pm 0.14$  | $1.74 \pm 0.14$ | $1.74 \pm 0.15$ |

**Table S8.** QMT coefficient,  $\kappa$ , at 298 K for every snapshot structure.

| <b>Snapshot</b> | <b>HH</b>      | <b>DH</b>      | <b>HD</b>      | <b>DD</b>     |
|-----------------|----------------|----------------|----------------|---------------|
| <b>1</b>        | 18.1350        | 11.7440        | 13.3200        | 9.8500        |
| <b>2</b>        | 26.4160        | 12.1810        | 19.3020        | 10.7400       |
| <b>3</b>        | 18.8090        | 9.9343         | 14.3290        | 8.7351        |
| <b>4</b>        | 16.0500        | 9.0398         | 12.9440        | 7.8695        |
| <b>5</b>        | 20.0141        | 9.7592         | 14.6750        | 8.2463        |
| <b>6</b>        | 21.7150        | 10.1760        | 15.8890        | 8.7924        |
| <b>7</b>        | 32.8020        | 15.4500        | 24.2180        | 13.6190       |
| <b>8</b>        | 23.0410        | 11.5080        | 16.2690        | 9.6194        |
| <b>9</b>        | 29.0580        | 14.4100        | 22.1390        | 12.7580       |
| <b>10</b>       | 28.3550        | 11.8610        | 17.2380        | 10.3050       |
| <b>11</b>       | 27.9800        | 13.3530        | 20.2910        | 11.6810       |
| <b>12</b>       | 17.1320        | 6.3664         | 11.5730        | 5.5118        |
| <b>13</b>       | 33.2540        | 14.8340        | 20.9150        | 12.8260       |
| <b>14</b>       | 18.1430        | 9.7750         | 12.9180        | 9.2246        |
| <b>15</b>       | 14.1010        | 8.8542         | 11.1580        | 8.1715        |
| <b>16</b>       | 26.4080        | 12.5010        | 20.4400        | 10.8790       |
| <b>17</b>       | 19.6950        | 9.6858         | 14.7560        | 8.4372        |
| <b>18</b>       | 31.9950        | 14.3880        | 24.3110        | 12.8380       |
| <b>19</b>       | 25.1440        | 9.8700         | 19.2410        | 8.4852        |
| <b>20</b>       | 28.6870        | 12.6360        | 21.1340        | 10.9700       |
| <b>21</b>       | 21.2150        | 11.1260        | 15.6960        | 9.7034        |
| <b>22</b>       | 22.2830        | 10.4410        | 16.6830        | 9.0644        |
| <b>23</b>       | 19.1670        | 9.5640         | 14.6300        | 8.3580        |
| <b>24</b>       | 27.8750        | 12.9630        | 21.1230        | 11.4950       |
| <b>25</b>       | 26.3200        | 12.0930        | 20.5300        | 10.5030       |
| <b>AVERAGE</b>  | <b>23.7518</b> | <b>11.3805</b> | <b>17.4289</b> | <b>9.9473</b> |
| <b>SD</b>       | <b>5.4766</b>  | <b>2.1662</b>  | <b>3.8691</b>  | <b>1.9112</b> |

**Table S9.** Average and standard deviation of QMT coefficient,  $\kappa$ , for HH and DH isotopologues at 278, 298 and 313K.

| <b>278</b>     |         |         |                     |
|----------------|---------|---------|---------------------|
|                | HH      | DH      | $\kappa_D/\kappa_H$ |
| <b>AVERAGE</b> | 38.4731 | 19.5234 | 2.0570              |
| <b>SD</b>      | 7.0835  | 3.3461  | 0.3954              |

| <b>298</b>     |         |         |                     |
|----------------|---------|---------|---------------------|
|                | HH      | DH      | $\kappa_D/\kappa_H$ |
| <b>AVERAGE</b> | 23.7518 | 11.3805 | 2.0854              |
| <b>SD</b>      | 5.4766  | 2.1662  | 0.2544              |

| <b>313</b>     |        |        |                     |
|----------------|--------|--------|---------------------|
|                | HH     | DH     | $\kappa_D/\kappa_H$ |
| <b>AVERAGE</b> | 16.359 | 8.4226 | 1.9547              |
| <b>SD</b>      | 7.2448 | 3.4667 | 0.3543              |

## Additional References

- (1) Hay, S.; Pudney, C. R.; Hothi, P.; Scrutton, N. S. *J Phys Chem A* **2008**, *112*, 13109.
- (2) Hobbs, J. K.; Jiao, W.; Easter, A. D.; Parker, E. J.; Schipper, L. A.; Arcus, V. L. *ACS chemical biology* **2013**, *8*, 2388.
- (3) Arcus, V. L.; Prentice, E. J.; Hobbs, J. K.; Mulholland, A. J.; Van der Kamp, M. W.; Pudney, C. R.; Parker, E. J.; Schipper, L. A. *Biochemistry* **2016**, *55*, 1681.
- (4) Alhambra, C.; Corchado, J.; Sánchez, M. L.; Garcia-Viloca, M.; Gao, J.; Truhlar, D. G. *J. Phys. Chem. B* **2001**, *105*, 11326.
- (5) Gertner, B. J.; Wilson, K. R.; Hynes, J. T. *J. Chem. Phys.* **1989**, *90*, 3537.
- (6) Grote, R. F.; Hynes, J. T. *J. Chem. Phys.* **1980**, *73*, 2715.
- (7) Hynes, J. T. *The Theory of Chemical Reactions Dynamics*; Baer, M.: CRC Press, Boca Raton, FL, 1985.
